# Supplementary material for: Obtaining Highly Active Catalytic Antibodies Capable of Enzymatically Cleaving Antigens
Source: MDPI journal article supplement (doi:10.3390/ijms232214351), 2022-11-18
Supplement: s1 [file s1]

## **Supplemental Figures and Tables**

### **Figure S1 AA sequences for #7TR and H34 light chains**

- a) #7TR human catalytic antibody light chain
- b) H34 human catalytic antibody light chain

### **Figure S2 Chemical structure of FRET adducted peptide substrates**

For each peptide, MCA (4-methyl-coumaryl-7-amide; Fluorescent reagent) was adducted at N-terminal and DNP (2,4-dinitrophenyl; Quenching reagent). Lysine was inserted in order to bind with DNP.

- a) FRET-A $\beta$  substrate; FRET was adducted for the peptide from 26 to 33 of A $\beta$ .
- b) FRET-PD1 substrate; FRET was adducted for the peptide from 123 to 140 of PD-1 (this region is the epitope of anti PD-1 mAb, Nivolumab).

### **Figure S3 Procedure, chromatography and SDS-PAGE analysis in 1st purification step (Ni-NTA column chromatography)**

## Amino acid sequences of #7TR and H34 human light chains

- a) **#7TR**: Subgroup II of human kappa light chain (Kabat's classification)  
MDVVM TQSP LSLP VTPG EPAS ISC RSSQSLHSNTRNYLD WYLQKPGQSPQLLIY LGSN RAS  
GVPDR FSGSGSGTDFTLKISRVEAEDVGVYYC MQALQTPRT FGQG TKVEIKRTVAAPSVFIFP  
PSDEQLKSGTASVVCLLNNFYPREAKVQWKVDNALQSGNSQESVTEQDSKDSTYSLSSTLTLSKADYEKHKLYACEVTHQGLSSPVTKSFNRGEC(LEHHHHHHH)-----MW=25170.8
- b) **H34**: Subgroup I of human kappa light chain (Kabat's classification)  
MDIQMTQSPSTLSASVGDRVITTC RASQSISSWLA WYQQKPGKAPKVLIIY KASTLES GVPLR  
FSGSGSGTEFTLTISSLQPDDFATYYC QQYSTYRT FGQG TKVEIKRTVAAPSVFIFPPSDEQLKSGTASVVCLLNNFYPREAKVQWKVDNALQSGNSQESVTEQDSKDSTYSLSSTLTLSKADYEKH  
KVYACEVTHQGLSSPVTKSFNRGEC(LEHHHHHHH)-----MW=24575.1

**Red: CDR-1**

**Blue: CDR-2**

**Green: CDR-3**

Methionine at 0<sup>th</sup> position is adducted because of insertion of a restriction enzyme site (*NcoI*).

(LEHHHHHHH) is adducted because of insertion of His-tag.

**Figure S1a and S1b**

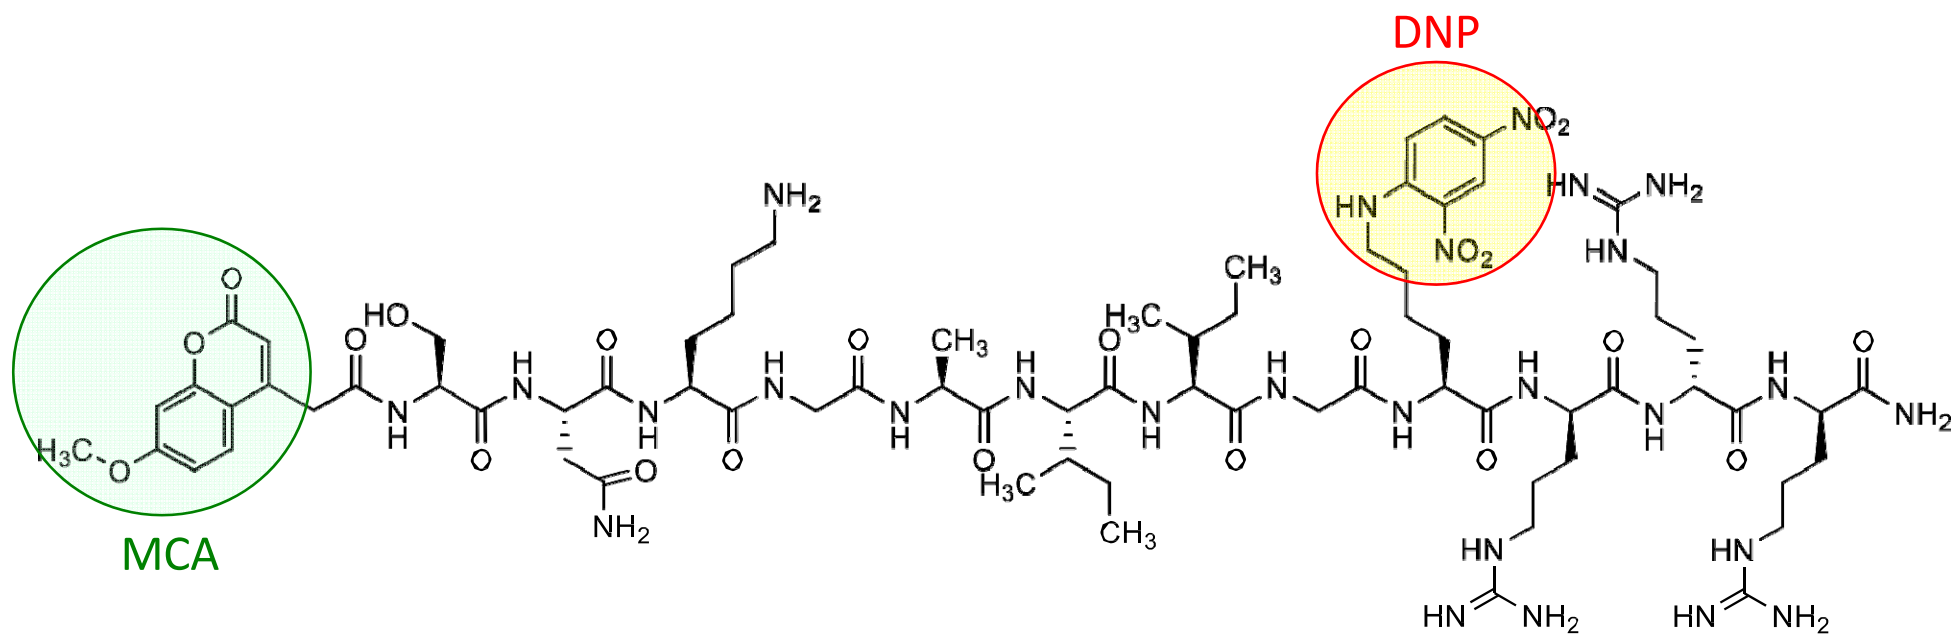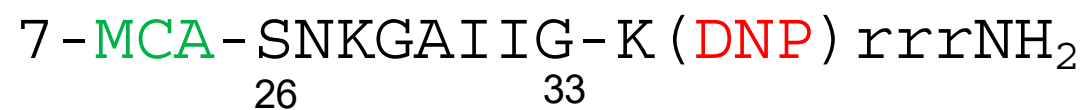

**Figure S2a**

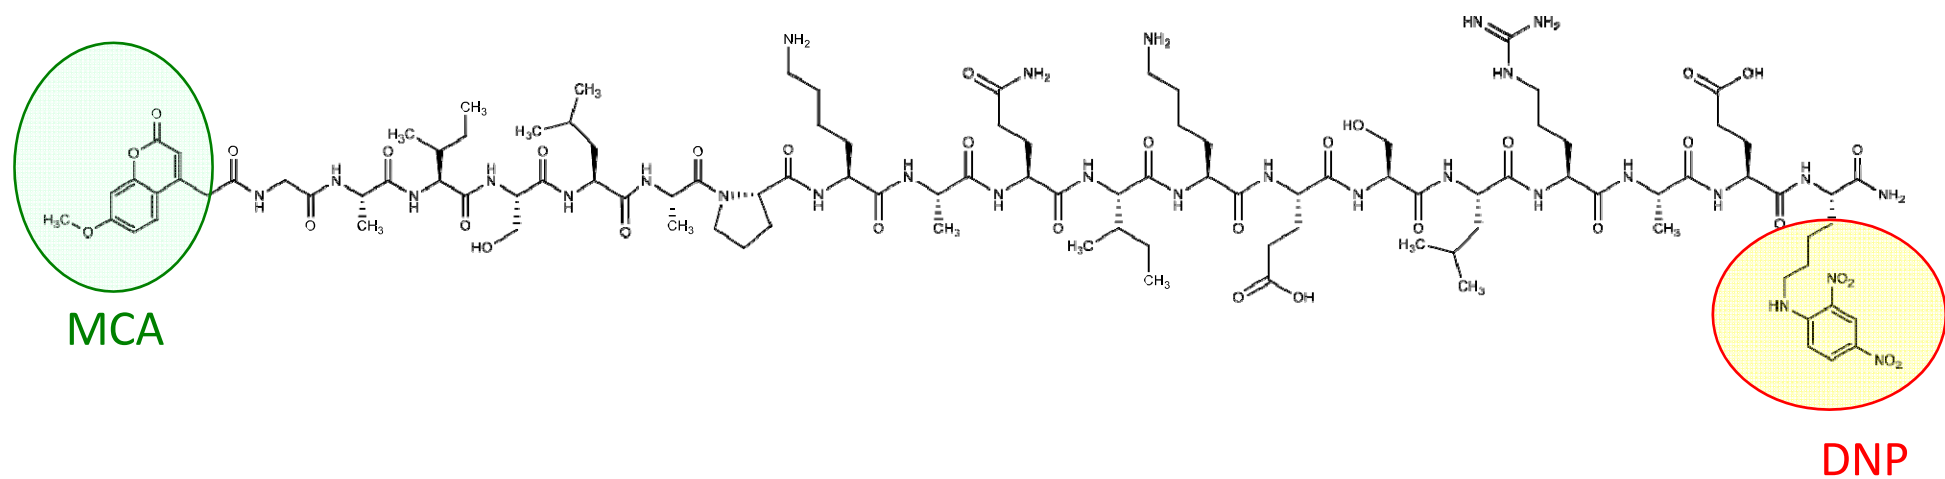

7-MCA-GAISLAPKAQIKESLRAE-K (DNP) -NH<sub>2</sub>

**Figure S2b**

# First purification step (Ni-NTA Column chromatography)

## 【Procedure】

### Ni-NTA Column chromatography

Column; Ni-NTA agarose gel(QIAGEN)

Buffer; 250 mM NaCl, 25 mM Tris-HCl,pH8.0

Imidazole conc.;30-300 mM

1.25 eq CuCl<sub>2</sub> addition.  
Incubation overnight

Concentration

50 mM EDTA addition.  
Incubation 1 h

Dialysis for PBS

Filtration (0.2μM). Stored at 4°C

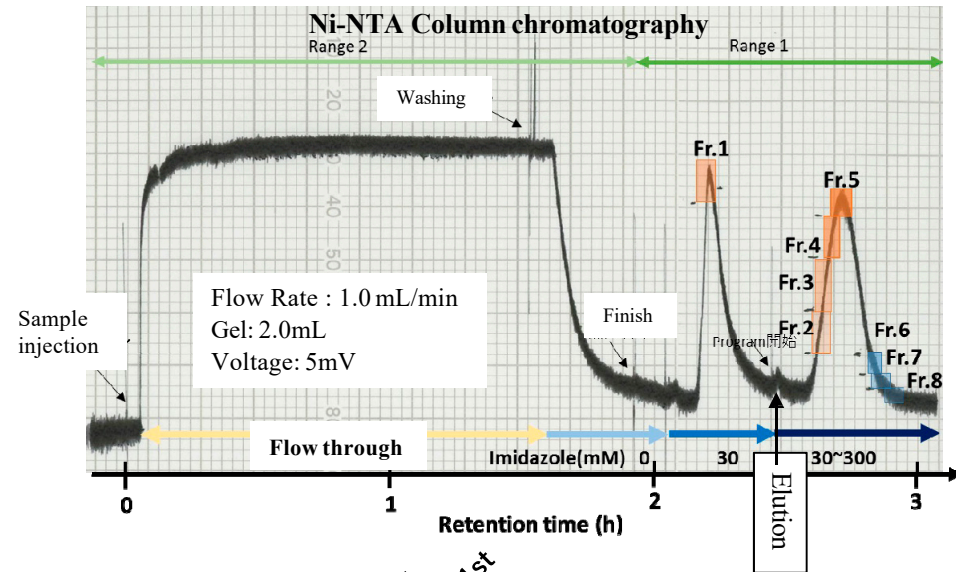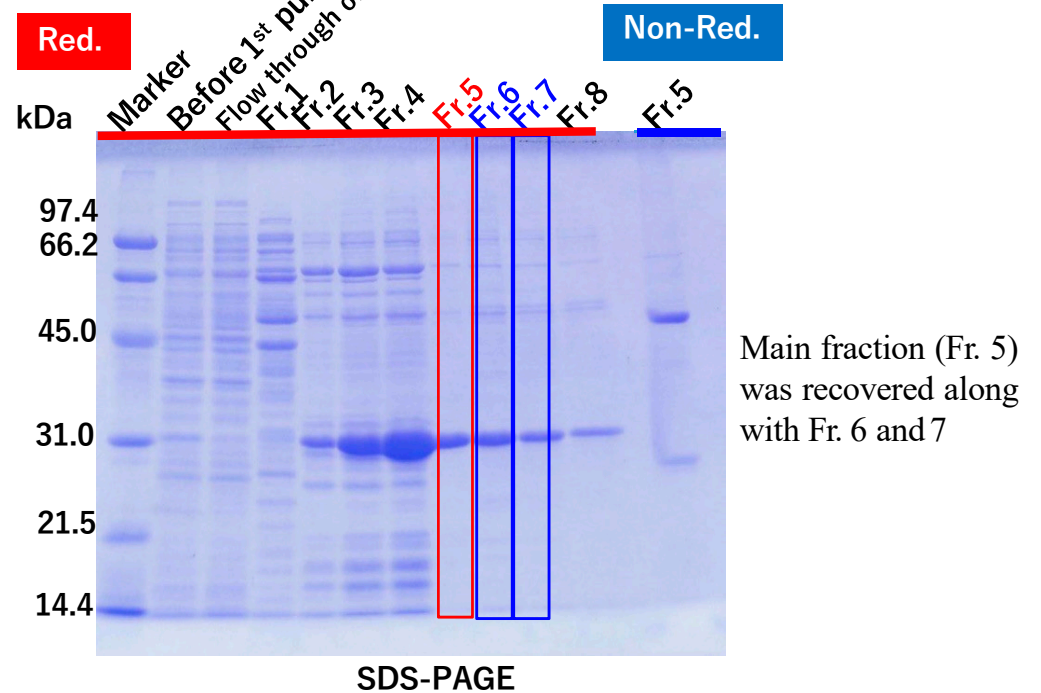

**Figure S3**

**Fr.5: Main fraction (applied with 1/10 dilution)**

**Table S1.** Summary for preparations for #7TR light chain

| Route # | First purification Method | Second purification Method | pH  | NaCl      | Catalytic activity |
|---------|---------------------------|----------------------------|-----|-----------|--------------------|
| "1"     | Ni-NTA                    | -                          | 8.0 | 250mM     | moderate           |
| "2"     | Ni-NTA                    | cation-exchange            | 5.5 | 100-500mM | low                |
| "3"     | Ni-NTA                    | cation-exchange            | 8.0 | 0 mM      | moderate           |
| "4"     | Ni-NTA                    | size-exclusion             | 5.5 | 137 mM    | low                |
| "5"     | Ni-NTA                    | size-exclusion             | 7.4 | 137 mM    | high               |
| "6"     | Ni-NTA                    | size-exclusion             | 8.0 | 137 mM    | high               |
| "7"     | Ni-NTA                    | size-exclusion             | 5.5 | 0 mM      | extremely low      |
| "8"     | Ni-NTA                    | size-exclusion             | 8.0 | 0 mM      | low                |

**Table S2.** Kinetic values for H34 and other catalytic antibody light chains

| Catalytic antibody      |                                             | k <sub>cat</sub><br>(min <sup>-1</sup> ) | K <sub>m</sub> (M)     | k <sub>cat</sub> /K <sub>m</sub><br>(min <sup>-1</sup> M <sup>-1</sup> ) | substrate                      |
|-------------------------|---------------------------------------------|------------------------------------------|------------------------|--------------------------------------------------------------------------|--------------------------------|
| #7TR (route “5” (pH7.4) |                                             | 2.5 x 10 <sup>-3</sup>                   | 1.05x10 <sup>-4</sup>  | 2.38 x 10                                                                | Arg-pNA                        |
| L12 light chain         |                                             | 1.6 x 10 <sup>-3</sup>                   | 5.3 x 10 <sup>-5</sup> | 3.0 × 10                                                                 | Pro-Phe-Arg-MCA <sup>16)</sup> |
| H34                     | Purification (I); Ni-NTA at pH8.0           | 5.5 × 10 <sup>-2</sup>                   | 3.2 × 10 <sup>-6</sup> | 1.7 × 10 <sup>4</sup>                                                    | FRET-PD-1                      |
|                         | Purification (II); cation exchange at pH5.5 | 5.8 × 10 <sup>-3</sup>                   | 7.9 × 10 <sup>-6</sup> | 7.4 × 10 <sup>2</sup>                                                    | FRET-PD-1                      |
|                         | Purification (III); size-exclusion at pH7.4 | 1.8 × 10 <sup>-1</sup>                   | 3.1 × 10 <sup>-6</sup> | 5.9 × 10 <sup>4</sup>                                                    | FRET-PD-1                      |
| aIgV                    |                                             | 3.0 x 10 <sup>-1</sup>                   | 8.0 x 10 <sup>-5</sup> | 3.8 × 10 <sup>3</sup>                                                    | Aβ <sup>34)</sup>              |
